# Supplementary material for: Identification and Functional Validation of PTH2R as a Therapeutic Target in Lung Adenocarcinoma
Source: MDPI journal article supplement (doi:10.3390/biomedicines14020489), 2026-02-23
Supplement: s1 [file biomedicines-4099380-supplementary.pdf › biomedicines-4099380-supplementary.pdf]

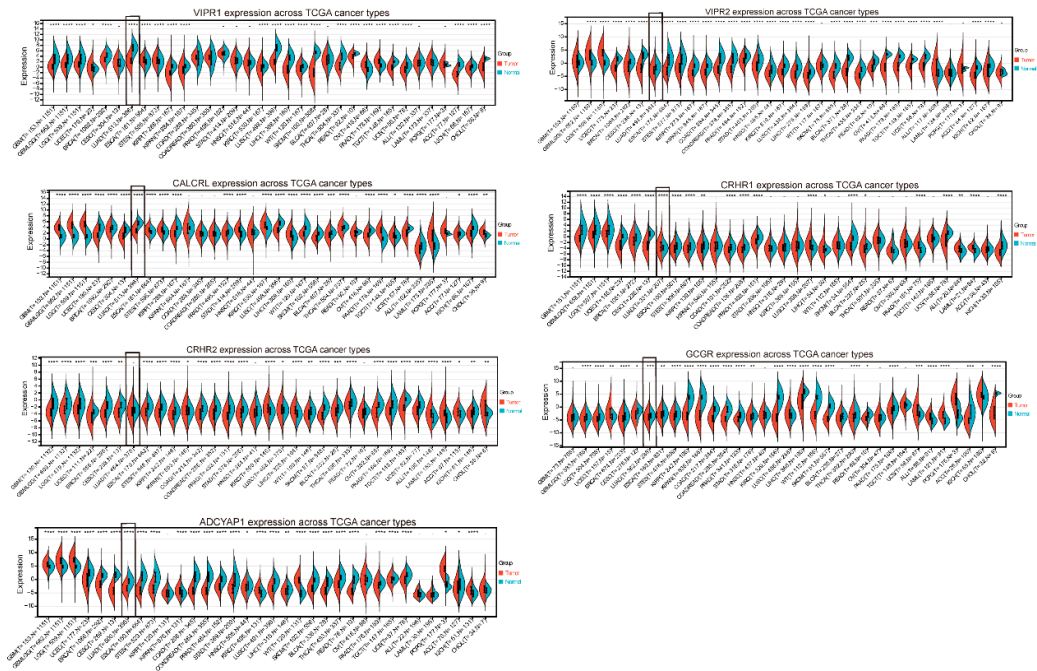

**Figure S1.** Sangerbox 3.0 was used to evaluate the expression levels of VIPR1, VIPR2, CALCRL, CRHR1, CRHR2, GCGR and ADCYAP1 in various tumor types from the TCGA database. Red indicates high expression, blue indicates low expression, and LUAD is marked with a black box. (\*  $p < 0.05$ , \*\*  $p < 0.01$ , \*\*\*  $p < 0.001$ , \*\*\*\*  $p < 0.0001$ ).

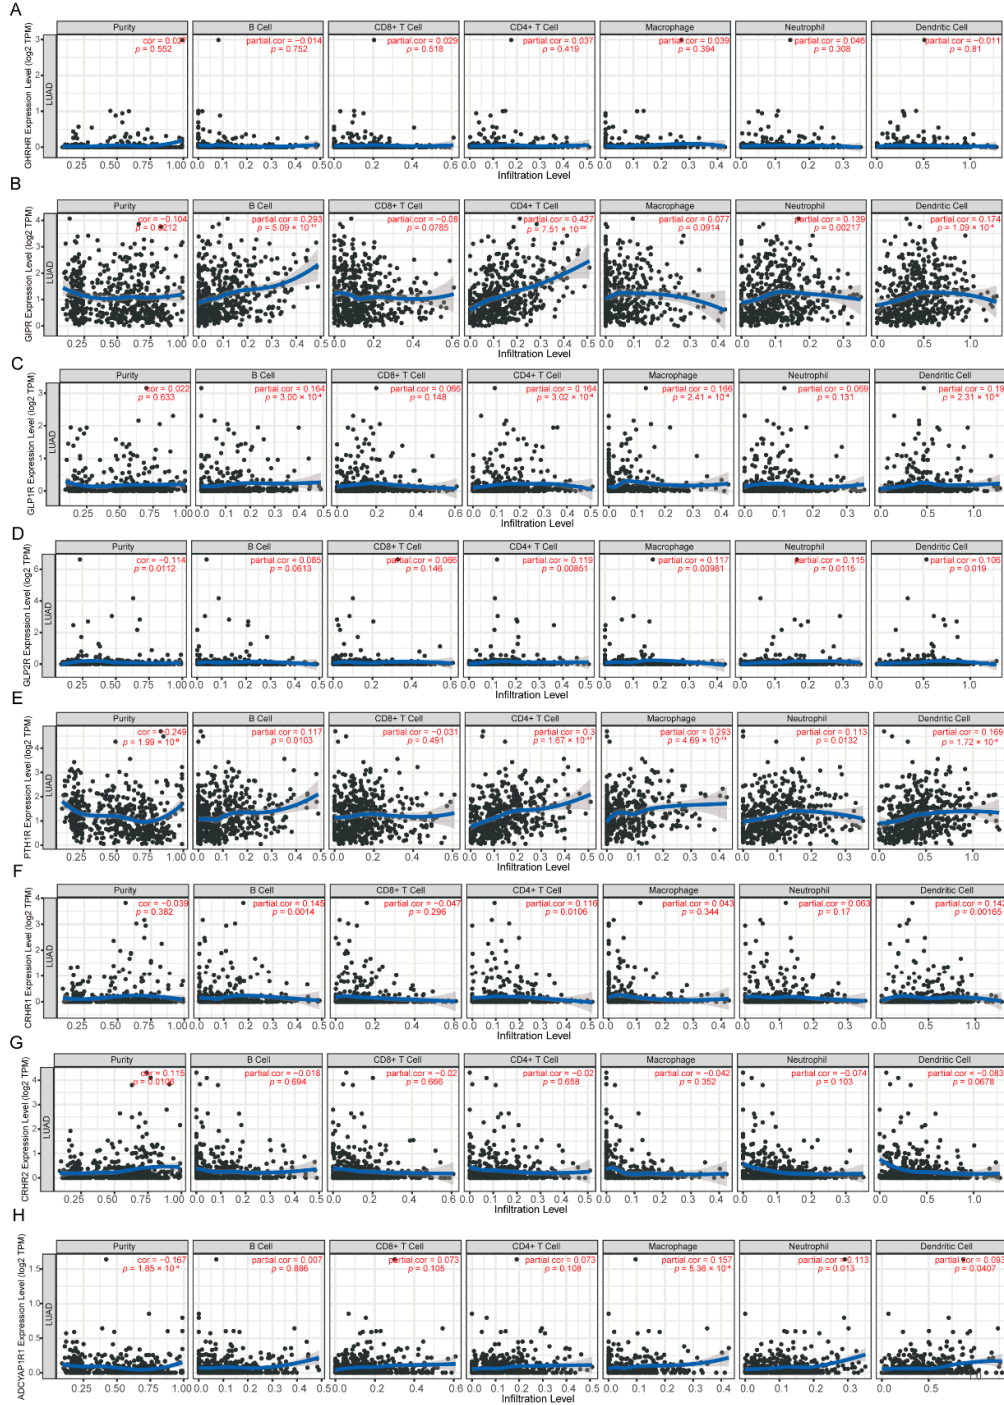

**Figure S2.** Correlation of family B1 GPCRs expression with immune infiltration levels in LUAD. (A) GHRHR was negatively correlated with infiltration levels of B cells and dendritic cells. (B) GPR was correlated with infiltration levels of B cells, CD4+ T cells, and dendritic cells. (C) GLP1R expression was positively correlated with infiltration levels of tumor-infiltrating lymphocytes. (D) GLP2R expression was positively correlated with infiltration levels of tumor-infiltrating lymphocytes. (E) PTH1R was positively correlated with infiltration levels of CD4+

T cells and negatively correlated with CD8+ T cells. (F) CRHR1 expression was positively correlated with infiltration levels of tumor-infiltrating lymphocytes. (G) CRHR2 expression was positively correlated with infiltration levels of tumor-infiltrating lymphocytes. (H) ADCYAP1R1 expression was positively correlated with infiltration levels of tumor-infiltrating lymphocytes.
